# Supplementary material for: Secretory leukocyte protease inhibitor influences periarticular joint inflammation in Borrelia burgdorferi-infected mice
Source: eLife. 2025 May 20;14:RP104913. doi: 10.7554/eLife.104913 (PMC12092001; doi:10.7554/eLife.104913)
Supplement: Figure 1—source data 1. [file elife-104913-fig1-data1.xlsx]

## Sheet: Fig.1A
WT	Slpi-/-
0.000797019	0.000400811
0.000465111	3.48651e-05
0.000273441	0.00074874
0.000456488	0.0015286
3.92542e-05	0.000426721
0.000257473	0.0001759
9.37643e-05	4.10274e-05
4.79009e-05

## Sheet: Fig.1B
WT	Slpi-/-
0.00514949	0.00244023
0.00365441	0.012748
0.00579014	0.00284946
0.00960545	0.00165999
0.00219089	0.0038685
0.00544104	0.00849919
0.00744602	0.00398537
0.00270727	0.00404222

## Sheet: Fig.1C
WT	Slpi-/-
0.000969301	0.00280358
0.000379525	0.00181968
0.00173797	0.000990702
0.00202994	0.00106061
0.00123045	0.00122636
0.00155936	0.00172269
0.00175143	0.00138871
0.00115242	0.00262248

## Sheet: Fig.1D
WT	Slpi-/-
0.00644285	0.00307292
0.0117341	0.00261822
0.00404732	0.00667106
0.00530818	0.00277458
0.00438813	0.00495981
0.00666397	0.00266768
0.00163786	0.00166855
0.00232464	0.00106269
0.0015182	0.00203125
0.00307617	0.00143549
0.00342074	0.00185759
0.00381576

## Sheet: Fig.1E
WT	Slpi-/-
0.0033611	0.0355123
0.0011691	0.0079158
0.0039115	0.0218739
0.0020115	0.0343549
0.0013793	0.0279611
0.0009659	0.0529563
0.0223048	0.0769849
0.0031008	0.0520988
0.0017131	0.0248597
0.0026599	0.0176029
0.0023448
0.0029075
