# Supplementary material for: Secretory leukocyte protease inhibitor influences periarticular joint inflammation in Borrelia burgdorferi-infected mice
Source: eLife. 2025 May 20;14:RP104913. doi: 10.7554/eLife.104913 (PMC12092001; doi:10.7554/eLife.104913)
Supplement: Figure 2—source data 1. [file elife-104913-fig2-data1.xlsx]

## Sheet: Fig.2B
WT	WT	SLPI-/-	Slpi-/-
0	0	0	0
0	0	0	0
0	0	0	1
0	1	0	1
	0	0	0
	0		1
	0		3
	0		3
	0		1
	0		0
	0		1
	0		2
	0		3
	0
	0		3
	0		2
	0		3
	0		0
	0		0
	0		3

## Sheet: Fig.2D
WT	WT	SLPI-/-	Slpi-/-
0	0	0	1
0	0	0	2
0	0	0	0
	0	0	2
	0		0
	0		1
	2		2
			2
	0		3
	0		3
	0		0
	0		0
	0		0
	0
