# Supplementary material for: Secretory leukocyte protease inhibitor influences periarticular joint inflammation in Borrelia burgdorferi-infected mice
Source: eLife. 2025 May 20;14:RP104913. doi: 10.7554/eLife.104913 (PMC12092001; doi:10.7554/eLife.104913)
Supplement: Figure 3—figure supplement 1—source data 1. [file elife-104913-fig3-figsupp1-data1.xlsx]

## Sheet: Figure 3-figure supplemental 1
WT	Slpi-/-
4.59	29.1
10.8	21.1
5.54	24.1
4.43	9.81
4.63	23.8
19.5	15.7
25.6627	45.1913
11.1395	36.659
28.6448	25.8727
18.454	48.5889
