# Supplementary material for: Secretory leukocyte protease inhibitor influences periarticular joint inflammation in Borrelia burgdorferi-infected mice
Source: eLife. 2025 May 20;14:RP104913. doi: 10.7554/eLife.104913 (PMC12092001; doi:10.7554/eLife.104913)
Supplement: Figure 3—figure supplement 2—source data 1. [file elife-104913-fig3-figsupp2-data1.xlsx]

## Sheet: A
WT	WT	Slpi-/-	Slpi-/-
1.36	11.62	5.28	27.97
3.11	1.02	2.84	2.28
4.35	8.23	2.28	3.37
2.84	2.84	3.37	45.91
	4.35		5.28
	7.42		1.02

## Sheet: B
WT	WT	Slpi-/-	Slpi-/-
0.552145	0.473212	1.85263	2.73651
0.491811	3.85134	3.37332	4.26838
0.349889	0.202997	4.85234	0.439008
10.5249	4.81457	0.101598	0.986427
	5.96781		12.0159
	0.034934		0.671803
	2.60506		5.57447
	0.0750696		0.712941
