# Supplementary material for: Secretory leukocyte protease inhibitor influences periarticular joint inflammation in Borrelia burgdorferi-infected mice
Source: eLife. 2025 May 20;14:RP104913. doi: 10.7554/eLife.104913 (PMC12092001; doi:10.7554/eLife.104913)
Supplement: Figure 3—source data 1. [file elife-104913-fig3-data1.xlsx]

## Sheet: Fig.3A
WT	Slpi-/-
32.6	51.9
25	48.9
20.6	46.5
24	36.4
22.9	52
38.4	36.2
35.3	35.6
26.2	36.8
40.4	23.6
30.6	40.7

## Sheet: Fig.3B
WT	Slpi-/-
6.47	42.2
16.5	30.5
8.28	39.5
7.19	17.4
8.5	35.4
31.8	24.4
6.16	21.1
4.57	13.7
13.2	4.68
3.74	32.9

## Sheet: Fig.3C
WT	WT	Slpi-/-	Slpi-/-
1.91584	0.680728	1.00783	1.41376
1.08846	0.370595	1.26053	2.66139
0.658055	1.19613	1.83583	3.54826
0.72873	0.906297	0.692486	1.35714
	0.996831		1.89872
	1.7342		2.47512
	1.89489		1.85899
	1.11629		2.43213

## Sheet: Fig.3D
WT	WT	Slpi-/-	Slpi-/-
0.716	8.407	2.92456	22.4434
0.859	5.915	3.75346	29.6143
1.293	7.278	8.86562	29.6143
1.257	1.079	7.66466	6.67247
	4.752		21.0861
	9.645		9.50194
	7.013		35.2175

## Sheet: Fig.3E
WT	WT	Slpi-/-	Slpi-/-
0.804	1.29	1.07179	2.59299
1.822	0.768	1.89132	4.95527
1.014	1.492	1.54381	4.75174
0.673	1.012	1.68329	1.7883
	0.94		2.58942
	1.849		3.0048
	1.574		1.93501
	2.308		3.14851

## Sheet: Fig.3F
WT	WT	Slpi-/-	Slpi-/-
12.5	32.08	1.2	41.92
22.84	0	7.63	71.67
0.55	13.33	0	11.95
0	3.44	0.79	19.66
	3.57		32.36
	19.52		28.69

## Sheet: Fig.3G
WT	WT	Slpi-/-	Slpi-/-
5.74286	9.39378	10.1466	8.53342
9.38571	5.8448	7.24289	19.7181
9.81429	6.27498	7.78061	10.5768
3.74286	1.86563	6.49007	12.8352
	4.98444	1.543	9.93151
	3.47881	4.66181	6.59762
	8.85606	6.92025	4.55426
	2.18827	5.62971	15.954
		7.56552	11.1145
			9.60887
			10.7919
			9.71642

## Sheet: Fig.3H
C3H/HeN	C3H/HeN
5.41462	9.17869
5.62971	6.27498
4.23163	3.90899
3.90899	3.15618
1.543	10.3617
4.23163	9.07115
5.19953	15.4163
4.44672	6.05989
	6.16744
	6.16744
	6.59762
	7.78061

## Sheet: Fig.3I
WT	WT	Slpi-/-	Slpi-/-
86.8216	104.004	161.399	275.426
121.257	126.435	155.224	137.198
86.7139	111.403	143.24	220.762
	132.524		235.757
	78.7614		240.183
