# Supplementary material for: Secretory leukocyte protease inhibitor influences periarticular joint inflammation in Borrelia burgdorferi-infected mice
Source: eLife. 2025 May 20;14:RP104913. doi: 10.7554/eLife.104913 (PMC12092001; doi:10.7554/eLife.104913)
Supplement: Figure 4—source data 1. [file elife-104913-fig4-data1.xlsx]

## Sheet: Fig.4
HC	LD
38.9222	35.1444
34.3667	41.8111
33.2556	26.5889
40.3667	29.3667
48.3667	31.2556
	38.4778
	30.8111
	19.4778
	27.9222
	34.1444
	36.7
	49.7
	37.2556
	30.0333
	26.5889
	30.8111
	19.3667
	21.2556
	20.2556
