# Supplementary material for: Secretory leukocyte protease inhibitor influences periarticular joint inflammation in Borrelia burgdorferi-infected mice
Source: eLife. 2025 May 20;14:RP104913. doi: 10.7554/eLife.104913 (PMC12092001; doi:10.7554/eLife.104913)
Supplement: Figure 5—figure supplement 1—source data 1. [file elife-104913-fig5-figsupp1-data1.xlsx]

## Sheet: B
	slpi			Proteinase K treatment
10 ng	0.107	0.16	0.189	0.019	0.039	0.049
30 ng	0.284	0.231	0.213	0.062	0.047	0.034
100 ng	0.429	0.345	0.353	0.085	0.048	0.087
300 ng	0.507	0.805	0.849	0.166	0.181	0.225
