# Supplementary material for: Secretory leukocyte protease inhibitor influences periarticular joint inflammation in Borrelia burgdorferi-infected mice
Source: eLife. 2025 May 20;14:RP104913. doi: 10.7554/eLife.104913 (PMC12092001; doi:10.7554/eLife.104913)
Supplement: Figure 5—figure supplement 2—source data 1. [file elife-104913-fig5-figsupp2-data1.xlsx]

## Sheet: A
hSLPI	0.625 µM	1.25 µM	2.5 µM	5 µM	10 µM
	119.57	104.535	112.649	100	109.785
	108.582	118.843	102.425	110.261	68.2836
	113.529	94.3137	92.1569	94.3137	119.608

## Sheet: B
20% WT anti serum	hSLPI		2h				4h
+	-	39.9529	40.861	49.8768	47.9086	32.6624	30.6806	52.3872	51.5485
+	1.25 µM	30.3771	33.0553	49.6441	47.3147	33.1062	29.7711	51.4192	51.2388
+	2.5 µM	33.3235	32.5935	50.2053	43.3256	27.7496	25.9967	47.8425	46.5761
+	5 µM	31.1874	32.1615	48.0427	45.9721	28.225	28.6797	50.7465	54.68
