# Supplementary material for: Secretory leukocyte protease inhibitor influences periarticular joint inflammation in Borrelia burgdorferi-infected mice
Source: eLife. 2025 May 20;14:RP104913. doi: 10.7554/eLife.104913 (PMC12092001; doi:10.7554/eLife.104913)
Supplement: Figure 5—source data 1. [file elife-104913-fig5-data1.xlsx]

## Sheet: Fig.3A
WT	SLPI-/-
32.6	51.9
25	48.9
20.6	46.5
24	36.4
22.9	52
38.4	36.2
35.3	35.6
26.2	36.8
40.4	23.6
30.6	40.7

## Sheet: Fig.5A
	slpi				fc
1 ng	0.302	0.222	0.43	0.191	0.244	0.221	0.133	0.13
10 ng	0.473	0.366	0.362	0.386	0.244	0.239	0.155	0.2
100 ng	1.531	1.512	1.419	0.833	0.319	0.279	0.372	0.128
1 ug	1.309	1.303	2.063	1.966	0.259	0.209	0.129	0.159
